# Supplementary material for: Differential sources of host species heterogeneity influence the transmission and control of multihost parasites
Source: PubMed Central journal article supplement (PMC4282463; doi:10.1111/ele.12122), 2013-05-28
Supplement: ele0016-0975-SD12.pdf [file ele0016-0975-SD12.pdf]

**Table S1** Efficacy of untargeted and targeted control, as measured by the rate of reduction in parasite transmission with number of individuals of host species  $i$  treated ( $C_i$ )

| Key host type                      | Untargeted control                  | Targeted control                        |
|------------------------------------|-------------------------------------|-----------------------------------------|
| Pure super-abundant                | $-\frac{C_i}{\sum_j H_j}$           | $-\frac{C_i}{\sum_j H_j p_j}$           |
| Pure super-infected                | $-\frac{C_i NT}{\sum_j H_j}$        | $-\frac{C_i}{\sum_j H_j p_j}$           |
| Pure super-shedder                 | $-\frac{C_i NT}{\sum_j H_j}$        | $-\frac{C_i NT}{\sum_j H_j p_j}$        |
| Mixed<br>super-abundant & infected | $-\frac{C_i \sqrt{NT}}{\sum_j H_j}$ | $-\frac{C_i}{\sum_j H_j p_j}$           |
| Mixed<br>super-abundant & shedder  | $-\frac{C_i \sqrt{NT}}{\sum_j H_j}$ | $-\frac{C_i \sqrt{NT}}{\sum_j H_j p_j}$ |
| Mixed<br>super-infected & shedder  | $-\frac{C_i NT}{\sum_j H_j}$        | $-\frac{C_i \sqrt{NT}}{\sum_j H_j p_j}$ |
